1 **The *Pseudomonas aeruginosa* PilSR two-component system regulates both twitching and swimming**  
2 **motilities**

3

4 Sara L.N. Kilmury and Lori L. Burrows

5

6 Department of Biochemistry and Biomedical Sciences and the Michael G. DeGroote Institute for  
7 Infectious Disease Research, McMaster University, Hamilton, ON Canada

8 **Running Title:** PilS-PilR regulates FleSR expression

9

10 **Correspondence to:**

11 Dr. Lori L. Burrows, 4H18 Health Sciences Centre,

12 1280 Main St West, Hamilton, ON, Canada, L8S 1K4

13 Tel: 905-525-9140 x22029

14 Fax: 905-522-9033

15 Email: burrowl@mcmaster.ca

16

17 **Key Words:** Type IV pili, twitching motility, swimming motility, flagella, two-component systems,  
18 **transcriptomics, RNA-seq**

19

20

21

22

23

24

## 25 ABSTRACT

26 Motility is an important virulence trait for many bacterial pathogens, allowing them to position  
27 themselves in appropriate locations at appropriate times. Motility structures - pili and flagella - are also  
28 involved in sensing surface contact, which modulates pathogenicity. In *Pseudomonas aeruginosa*, the  
29 PilS-PilR two-component system (TCS) regulates expression of the type IV pilus (T4P) major subunit PilA,  
30 while biosynthesis of the single polar flagellum is regulated by a hierarchical system that includes the  
31 FleSR TCS. Previous studies in *Geobacter sulfurreducens* and *Dichelobacter nodosus* implicated PilR in  
32 regulation of non-T4P-related genes, including some involved in flagellar biosynthesis. Here we used  
33 RNAseq analysis to identify genes in addition to *pilA* with changes in expression in the absence of *pilR*.  
34 Among these were 10 genes inversely dysregulated by loss of *pilA* versus *pilR*, even though both *pilA* and  
35 *pilR* mutants lack T4P and pilus-related phenotypes. The products of those genes - many of which were  
36 hypothetical - may be important for virulence and surface-associated behaviours, as mutants had  
37 altered swarming motility, biofilm formation, type VI secretion, and pathogenicity in a nematode model.  
38 Further, the PilSR TCS positively regulated transcription of *fleSR*, and thus many genes in the FleSR  
39 regulon. As a result, *pilSR* deletion mutants had defects in swimming motility that were independent of  
40 the loss of PilA. Together these data suggest that in addition to controlling T4P expression, PilSR have a  
41 broader role in the regulation of *P. aeruginosa* motility and surface sensing behaviours.

42

## 43 IMPORTANCE

44 Surface appendages like type IV pili and flagella are important for establishing surface attachment and  
45 infection in a host in response to appropriate cues. The PilSR regulatory system that controls type IV  
46 pilus expression in *Pseudomonas aeruginosa* has an established role in expression of the major pilin PilA.  
47 Here we provide evidence supporting a new role for PilSR in regulating flagellum-dependent swimming  
48 motility in addition to pilus-dependent twitching motility. Further, even though both *pilA* and *pilR*  
49 mutants lack PilA and pili, we identified sets of genes downregulated in the *pilR* mutant and upregulated  
50 in a *pilA* mutant as well as those downregulated only in a *pilR* mutant, independently of pilus expression.  
51 This finding suggests that change in the inner membrane levels of PilA is only one of the cues to which  
52 PilR responds to modulate gene expression. Identification of PilR as a regulator of multiple motility  
53 pathways may make it an interesting therapeutic target for anti-virulence compounds.

54

## 55 INTRODUCTION

56 Prokaryotes rely on the use of two-component regulatory systems (TCS) to control many of their  
57 cellular activities. Typically comprised of a membrane-bound histidine sensor kinase and a cytoplasmic  
58 response regulator, TCSs allow bacteria to respond rapidly to chemical and physical changes in their  
59 intra- or extracellular environments, altering expression of specific genes in response to a stimulus (1).  
60 The opportunistic pathogen *Pseudomonas aeruginosa* encodes a higher-than-average number of TCSs  
61 (2) that control diverse functions, including several motility phenotypes. Flagellum-dependent  
62 swimming motility, for example, is controlled through a regulatory cascade that includes the  
63 transcriptional regulator, FleQ (3) and the FleS-FleR TCS, which like many TCSs also requires the  
64 alternate sigma factor RpoN ( $\sigma^{54}$ )(4). FleQ controls transcription of *fleS-fleR* in addition to multiple other  
65 flagellar, adhesion and biofilm-associated genes, in a c-di-GMP dependent manner (3, 5). FleSR has been  
66 implicated in the expression of 20 or more flagellar biosynthetic genes in *P. aeruginosa*, as well as  
67 additional genes not previously known to be involved in flagellar assembly or function (6).

68 The other major motility system in *P. aeruginosa* is the type IV pilus (T4P) system, which is used  
69 for twitching across solid and semi solid surfaces (7, 8) among other important functions. In contrast to  
70 the single polar flagellum that is used to propel the cell in low viscosity media, the cell extends multiple  
71 pili that retract – independently or in a coordinated bundle – pulling it towards the point of attachment  
72 (9-11). Pili can be extended from either pole, but typically a single pole is used at one time allowing for  
73 directional movement (12). The majority of the pilus fibre is made of hundreds to thousands of subunits  
74 of the major pilin protein, PilA (13), the expression of which could be energetically costly to the cell if  
75 not tightly controlled.

76 *pilA* transcription is regulated by another TCS, PilS-PilR, in *P. aeruginosa* and many other T4P-  
77 expressing bacteria (14-18). PilS is an atypical sensor histidine kinase (SK) with 6 transmembrane  
78 segments (19-21) that allow PilS to interact directly with PilA for pilin autoregulation (22). PilR is the  
79 cytoplasmic response regulator (RR) that binds in conjunction with  $\sigma^{54}$  to the *pilA* promoter to activate  
80 transcription (23, 24). Neither *pilA* nor *pilR* mutants express PilA and therefore T4P, but they have  
81 opposite PilR activation states. Activation of PilR upon transient decreases in PilA levels may be one way  
82 in which pilus attachment events are detected by the cell.

83 In contrast to the response regulator FleR, which has a well-defined regulon in *P. aeruginosa* (6),  
84 the suite of genes potentially controlled by PilR is poorly characterized. Genetic and *in silico* analyses of

85 the PilR regulons of *Geobacter sulfurreducens* (16, 25) and *Dichelobacter nodosus* (17) have been  
86 performed, but comparable studies are lacking in *P. aeruginosa*. Screening of the *G. sulfurreducens*  
87 genome for putative PilR binding sites revealed 54 loci with hypothesized  $\sigma^{54}$ -dependent promoters,  
88 many of which were upstream of genes for T4P and flagellar biosynthesis, or cell wall biogenesis (25).  
89 Those data, in combination with work performed in *D. nodosus*, which identified several surface-  
90 exposed proteins whose expression was controlled by PilR (17), suggest that *P. aeruginosa* PilR likely has  
91 additional functions beyond control of *pilA* transcription. However, each of the cited studies focused  
92 mainly on identification of genes and characterization of their pilus-related functions without examining  
93 other phenotypic consequences of loss of *pilR*.

94 In this work, we used RNAseq analysis to identify genes that were dysregulated by loss of *pilR*.  
95 Because *pilR* mutants lack pili, which are important for surface sensing (26) and control of downstream  
96 events such as biofilm formation (27), we included a *pilA* mutant in our analysis to distinguish genes  
97 whose expression is specifically controlled by PilR from those that are affected by the loss of PilA. In  
98 addition to several genes that were co-regulated with *pilA*, which we have termed “pilin-responsive”  
99 genes, we also identified multiple flagellar genes, including the FleSR TCS, as being downregulated only  
100 in the absence of *pilR*, in a pilin unresponsive manner. We show that the consequence of this  
101 downregulation is a previously unreported defect in swimming motility in both *pilS* and *pilR* mutants,  
102 independent of the loss of PilA. This work defines the pilin-dependent and independent regulons of PilR  
103 and provides evidence for a direct regulatory connection between the *P. aeruginosa* T4P and flagellar  
104 motility systems.

105

## 106 RESULTS

### 107 ***The expression of multiple genes is similarly altered in pilA and pilR mutants***

108 We performed RNAseq analysis to identify genes in addition to *pilA* that might be controlled by  
109 the PilSR TCS. However, in designing this experiment we considered that i) *pilR* mutants also lack  
110 expression of PilA; ii) loss of PilA contributes to a decrease in intracellular levels of the messenger  
111 molecule cyclic adenosine monophosphate (cAMP) (28); and iii) there are over 200 genes in *P.*  
112 *aeruginosa* that are at least partially cAMP-dependent, including Vfr, a cAMP-binding virulence factor  
113 regulator (28). To separate genes that are affected by the loss of PilA that occurs in both *pilA* and *pilR*  
114 mutants from those that are truly regulated by PilR, we categorized genes as those whose expression

115 was changed in only the *pilA* or *pilR* backgrounds, versus both backgrounds, compared to WT PAK  
116 **(Figure 1)**. The former group may also include genes that are cAMP-dependent. We did not include a  
117 *pilS* mutant in RNAseq analysis, because PilS potentially interacts with alternate response regulators,  
118 making it more challenging to distinguish genes that are controlled by PilSR and those regulated by PilS  
119 and other unidentified RRs (29). Genes that were dysregulated similarly by at least 2-fold in both the  
120 *pilA* and *pilR* mutants are summarized in **Table S1**, and included several T4P-associated genes such as  
121 *tsaP* (30), and minor pilins *fimU*, *pilV*, *pilW*, *pilY1* and *pilE* (31), previously identified as being Vfr  
122 dependent (28). In total, 18 of 56 genes in this category (highlighted in gray in **Table S1**) are also Vfr and  
123 cAMP-dependent (28). Since the expression of genes in this class was affected by loss of PilA, suggesting  
124 PilR's role is indirect, they were not examined further. No genes whose expression was dysregulated by  
125 loss of *pilA* but not *pilR* were identified.

#### 126 **Ten genes are inversely dysregulated by loss of *pilA* versus *pilR***

127 The expression of a subset of ten genes was decreased in the *pilR* mutant but markedly  
128 increased in the *pilA* mutant, even though *pilR* mutants also lack PilA (23) **(Figure 2, Table S2)**. We  
129 categorized these genes as 'pilin-responsive', because similar to PilA, their expression was dependent on  
130 PilR and increased when PilA levels were low. All but 3 of these genes encode hypothetical proteins or  
131 are unannotated in the PAO1 genome. The co-regulation of these genes with *pilA* suggests that their  
132 products could be previously unidentified contributors to T4P biogenesis and/or function, or to other  
133 forms of motility.

134 To test this hypothesis, we extracted mutants with insertions in homologs of those PAK genes  
135 from the ordered PA14 transposon (Tn) library (32). There were no transposon insertions in three of the  
136 ten genes, and one additional mutant failed to grow in liquid culture. The PAO1 and PA14 designations  
137 for the remaining 6 genes of interest for which mutants were available are listed in **Table 1**. We tested  
138 these mutants for twitching, swimming, and swarming motilities. While all had wild-type twitching  
139 motility, insertions in PA14\_51940 (PA0952), PA14\_11740 (PA4027) and PA14\_69560 (PA5267, *hcpB*)  
140 caused defects in swarming. Disruption of PA14\_695060 (*hcpB*) also reduced swimming, alluding to a  
141 role in flagellar function or biosynthesis, in addition to its established function in Type VI secretion  
142 **(Figure 3)**. Together, these data indicate that genes co-regulated with *pilA* are not necessarily required  
143 for T4P function, but a subset are involved in other forms of motility and in some cases, biofilm  
144 formation (33) and pathogenicity in *C. elegans* (34) **(Figure S1)**.

145 ***A subset of genes is dysregulated only by loss of PilR***

146 In the *pilR* mutant, 89 genes were dysregulated  $\geq 2$ -fold (**Table S3**). To prioritize our follow-up  
147 studies, we focused on a shorter list of genes with  $\geq 3$ -fold changes in expression. Prior to this study, *pilA*  
148 was the only known member of the PilS-PilR regulon in *P. aeruginosa* (19), though studies in *G.*  
149 *sulfurreducens* and *D. nodosus* suggested its regulon was likely to be broader (16, 17, 25). Of particular  
150 interest were 24 genes whose expression was  $\geq 3$ -fold altered in *pilR* mutants but unaffected by loss of  
151 *pilA*. These *pilR*-dependent but pilin unresponsive genes are highlighted in **Figure 2**. According to the  
152 *Pseudomonas* genome database (35), these genes include five putative chemotactic transducers, two  
153 biofilm-associated chemosensory proteins, six hypothetical proteins, and several metabolic enzymes.  
154 However, motility-associated genes were the most common class identified. The genes encoding the  
155 T4P assembly ATPase, PilB and prepilin peptidase, PilD, which share a divergently oriented promoter  
156 with *pilA*, were downregulated in *pilR* but unaffected by loss of *pilA* (**Figure 2**), even though previous  
157 studies suggested they were controlled by  $\sigma^{70}$ , not PilSR and  $\sigma^{54}$  (36).

158 ***Multiple flagellum biosynthetic genes are downregulated in a pilR mutant***

159 In addition to the T4P-associated genes above, several flagellum biosynthetic genes had  
160 decreased expression only in the *pilR* background (**Figure 2, Table S3 bolded text**). Among them were  
161 *fleS-fleR* encoding the FleSR TCS, part of a regulatory cascade that controls the expression of genes  
162 associated with flagellum biosynthesis and function (4, 6). Each had approximately 3-fold lower  
163 expression in *pilR* compared to WT, while there was no difference in their expression in *pilA* versus WT.  
164 This trend was verified using RT-PCR, though the magnitude was closer to 2-fold by this method  
165 (Supplemental **Figure S2**). Of the flagellar genes in this category (**Figure 2**), 10 of 12 (excluding *fleS* and  
166 *fleR*) are *fleR* dependent (6). The remaining two, *fliE* and *fliF*, are FleQ dependent, but also had  
167 decreased ( $\geq 2$ -fold) transcription in a *fleR* mutant in a previous study (6). These data suggest that PilSR  
168 positively regulates *fleSR* expression, and when PilR is absent, expression of FleSR-dependent genes is  
169 decreased accordingly.

170 ***Swimming motility is impaired by loss of pilS-pilR***

171 We next tested if downregulation of *fleSR* in the *pilS* and *pilR* backgrounds impacted swimming  
172 motility, using a plate-based assay. A *fliC* mutant lacking the flagellin subunit was used as a negative  
173 control. *pilA* mutants swam comparably to WT PAK, while *pilS* and *pilR* mutants – which also lack surface  
174 pili – exhibited significant swimming defects ( $p < 0.005$ ), with uniform zones that reached about 40% of

175 WT (**Figure 4, dashed line**). Interestingly, both *piIS* and *piIR* mutants produced flares with increased  
176 motility extending beyond these uniform swimming zones. These flares were hypothesized to be the  
177 result of suppressor mutations that could overcome the effect of *piIS* or *piIR* deletion on swimming.

178 To test this idea, we isolated cells from the inner swimming zones of *piIS* and *piIR* plates (inside  
179 the dashed line, **Figure 4**) and the putative suppressor mutants (flares outside the dashed line) and  
180 reassessed their ability to swim after culturing them overnight. As controls, we took samples from the  
181 WT zone close to the point of inoculation ('inner') and from the outer edge of the swimming zone  
182 ('outer'). Repeating the swimming assays with these samples revealed no difference in swimming  
183 between inner and outer samples from WT. However, *piIS* and *piIR* cells taken from the inner swimming  
184 zones recapitulated the original swimming motility defects of the mutants – including the re-appearance  
185 of highly motile suppressors – while cells taken from the outer flares had motility comparable to WT  
186 (**Figure 4**), indicating that they likely acquired mutation(s) that allow for full motility in the absence of  
187 *piISR*.

188 To test if other flagellum-dependent phenotypes were affected by loss of *piISR*, we measured  
189 swarming motility, using the original mutants and the suppressors isolated from the swimming  
190 experiments above. *piISR* mutants in PAO1 were previously reported to be non-swarmers (37), but in  
191 our hands the same mutants in the PAK background retain partial swarming motility, albeit with an  
192 altered morphology compared to WT. The PAK *piISR* mutants swarmed similarly to a *piIA* mutant, with  
193 fewer and irregular tendrils (**Figure S2**). Interestingly, *piISR* mutants isolated from the outer flares of the  
194 swimming plates in **Figure 4** had swarming motility comparable to those isolated from the inner zones  
195 and the parent *piIS* and *piIR* strains. While flagella are required for swarming, the suppressor mutations  
196 that restored swimming motility in the *piIS* and *piIR* backgrounds did not restore swarming, suggesting  
197 that expression of distinct swarming-related genes remains dysregulated.

#### 198 ***FleSR* impact twitching motility and *piIA* expression**

199 RNAseq analyses revealed that *PilR* was required for wild type expression of *fleSR*. We next  
200 tested if this was a reciprocal regulatory pathway in which *FleSR* might contribute to regulation of *piIS*-  
201 *piIR* and the *PilSR* regulon. We tested if loss of *fleSR* affected *piIA* expression and/or T4P function. A  
202 double deletion of *fleSR* was made in the PAK background, and twitching motility measured. Loss of  
203 *fleSR* reduced twitching motility to a modest but significant extent ( $p < 0.005$ ), with the double mutant  
204 reproducibly twitching to approximately 80% of WT (**Figure 5A**). Interestingly, when *piIA* transcription

205 was monitored using a *lux-pilA* reporter assay, *fleS-fleR* mutants had increased *pilA* transcription  
206 compared to WT over a 5 h time course (**Figure 5B**). Therefore, while FleS-FleR are involved in the  
207 modulation of twitching motility and *pilA* transcription, it is not yet clear if this occurs directly through  
208 regulation of *pilSR*, as increased levels of PilA can inhibit PilSR activation (22).

209

## 210 DISCUSSION

211 Two-component systems control a multitude of phenotypes, allowing for quick responses to  
212 sudden changes in a bacterium's intra- and extracellular environments. These systems can be important  
213 for survival, but also for coordinating virulence programs. Most TCSs explored to date control the  
214 transcription of multiple genes, but prior to this work *P. aeruginosa* PilR had only a single known target,  
215 *pilA* (23). Microarray and bioinformatics analyses of the *G. sulfurreducens* PilR regulon provided  
216 evidence that PilR regulates multiple genes, including those required for soluble Fe(III) uptake (a pilin-  
217 independent phenotype), flagellar assembly and function, and cell envelope biogenesis, though these  
218 predictions were not confirmed with phenotypic assays (16, 25). Here, we showed that PilR controls the  
219 expression of multiple genes, in pilin-responsive or unresponsive modes. Dysregulating expression of  
220 select members of the *P. aeruginosa* PilR regulon resulted in changes in swimming, swarming, and/or  
221 twitching motility, all phenotypes associated with virulence in specific hosts (27, 38-40).

222 The *G. sulfurreducens* and *D. nodosus* studies cited above failed to account for the confounding  
223 variable that PilA is not expressed when *pilR* is deleted. This was an important consideration in designing  
224 our RNAseq experiment (**Figure 1**), as loss of PilA results in decreased cAMP levels and by extension,  
225 downregulation of cAMP-dependent genes in the Vfr regulon, which includes a number of T4P-  
226 associated genes (28). This design also enabled us to further classify genes in the PilR regulon based on  
227 their responsiveness to pilin levels. As predicted, many of the genes that were similarly dysregulated by  
228 loss of both *pilA* and *pilR* are Vfr-dependent (28) (**Table S1**). Thus, we focused instead on those genes  
229 that were dysregulated in a PilR-dependent manner and further categorized them as pilin responsive or  
230 unresponsive.

231 We identified ten pilin-responsive genes with increased transcription in a *pilA* mutant but  
232 significantly decreased transcription in the absence of *pilR*, even though *pilR* mutants also lack PilA  
233 (**Figure 2**). While this expression pattern initially seemed counterintuitive, we propose that these gene  
234 products are regulated by PilS phosphorylation or dephosphorylation of PilR in response to fluctuating



235 PilA levels. At high concentrations, PilA represses its own transcription by interacting directly with PilS in  
236 the inner membrane, promoting its phosphatase activity on PilR (22). Conversely, when PilA is absent,  
237 PilS phosphorylates PilR and *pilA* promoter activity is significantly increased, presumably in an attempt  
238 to replenish intracellular PilA pools (41) but simultaneously increasing expression of other pilin  
239 responsive genes (**Figure 2, Table S2**). This signalling pathway may be one way in which adherence of a  
240 pilus to a surface is detected, through transient depletion of pilin pools in the inner membrane when  
241 attached pilus filaments fail to retract.

242 Many genes in this pilin-responsive category encoded hypothetical proteins or were  
243 unannotated in the PAO1 and PAK genomes; the latter may encode regulatory RNAs. We used available  
244 mutants from the PA14 Tn library to determine if the pilin-responsive genes were required for normal  
245 T4P function. While all mutants tested had WT twitching motility, some had decreased swarming, and  
246 one (PA14\_69560) had decreased swimming motility. The only genes in this group that were  
247 characterized previously are *hcpA* and *hcpB*, which encode proteins associated with the Type VI  
248 secretion system. They are paralogs, possibly resulting from a gene duplication event (35). This finding  
249 may represent a new link between T4P, flagellar function, and Type VI secretion, as the *hcpB* mutant had  
250 defects in both swimming and swarming. This connection further explains the swimming defects of *pilS*  
251 and *pilR* mutants (**Figure 4**).

252 We also identified genes that were affected only by loss of *pilR*, independent of PilA. These  
253 genes might be modulated in response to cues detected by a different, pilin-insensitive sensor kinase  
254 that can activate PilR. Alternatively, they may already be expressed in the WT at levels such that further  
255 activation upon loss of *pilA* did not meet our 2-fold cutoff. A third possibility is that they are indirectly  
256 upregulated as a result of PilR activity on adjacent promoters. For example, among these genes were  
257 those encoding the T4P assembly ATPase PilB and the prepilin peptidase, PilD, which are contiguous  
258 with *pilC* encoding the platform protein; however, there were insufficient reads in our RNAseq analysis  
259 to accurately determine *pilC* expression levels (**Figure 2**). Based on this and previous studies, *pilBCD* are  
260 not co-transcribed (35, 36). *pilB* was reported to be  $\sigma^{70}$  dependent (36), but our data suggest that PilR  
261 remodeling of the *pilA* promoter for transcription by the  $\sigma^{54}$  holoenzyme also facilitates transcription  
262 from the divergent *pilB* promoter.

263 Of the pilin unresponsive genes identified, the most abundant class were involved in  
264 biosynthesis, function, and regulation of the flagellum, including *fleSR* (**Figure 2, Table S3**) Most of the  
265 others are members of the FleSR regulon (6) suggesting they are indirectly regulated by PilR. Swimming

266 motility of *pilS* and *pilR* mutants was ~40% of WT, supporting the expression data (**Figure 4**). By carefully  
267 analyzing the swimming data, we hypothesized that suppressor mutations could overcome the defects  
268 imposed by *pilS* or *pilR* deletion, allowing the mutants to swim normally. Preliminary sequence analyses  
269 of these suppressors showed no mutations in *fleSR*, but it may be that mutations in *fleQ*, the promoter  
270 regions of *fleSR*, or as yet unidentified genes could increase activity or expression of *fleS-fleR*. The as-yet  
271 unidentified suppressors appear specific for flagellar function, as swarming motility (42) of the *pilS* and  
272 *pilR* mutants and the highly motile suppressors, all of which lack PilA, was comparable to that of a *pilA*  
273 mutant (**Figure S2**),

274 Although *pilSR* were not considered members of the FleSR regulon (6), twitching motility was  
275 modestly but reproducibly reduced to ~80% of WT in the absence of *fleSR* (**Figure 5A**), while *pilA*  
276 promoter activity was increased compared to WT (**Figure 5B**). This phenotype is reminiscent of  
277 mutations that inhibit pilus retraction, impairing twitching but increasing *pilA* transcription due to  
278 depletion of PilA subunits from inner membrane pools (11, 41). During prior characterization of the  
279 FleSR regulon, two new genes (PA3713 and PA1096/*fleP*) with motility phenotypes were identified.  
280 Mutants were significantly impaired in swimming, and in the case of *fleP*, twitching motility (6). FleP was  
281 proposed to control pilus length, as when it was deleted, surface pili were significantly longer than those  
282 of WT, resulting in a form of hyperpiliation (6). Decreased *fleP* expression in our *fleSR* mutants could  
283 impair twitching motility and alter *pilA* expression. Because of their FleSR dependence, expression of  
284 *fleP* and PA3713 may be decreased in *pilSR* mutants; however, the reads for them in our RNAseq  
285 experiment were too low to assess this idea.

286 Both the PilSR and FleSR TCSs are required for full virulence of *P. aeruginosa* –reviewed in (43) –  
287 as each is involved in multiple virulence-associated phenotypes. PilSR and FleSR each contribute to  
288 surface attachment and biofilm formation (27, 44), and are important for twitching and swimming  
289 motilities. Both PilSR and FleSR are required for swarming motility due to their involvement in pilus and  
290 flagellum function respectively (37, 42, 44), (**Figure S3**). Given the overlap in phenotypes controlled by  
291 PilSR and FleSR, it is perhaps not surprising that expression of the two systems may be linked. From our  
292 RNAseq analysis and subsequent phenotypic assays, we propose a model in which PilSR positively  
293 regulates *fleSR* transcription, independently of PilA depletion (**Figure 6**). The hierarchy for flagellar  
294 biosynthesis proposed by Dasgupta *et al.* (6) suggests that transcription of *fleSR* is predominantly  
295 dependent on FleQ. Since *fleQ* was not differentially expressed in *pilR*, we infer that PilSR promotes  
296 *fleSR* transcription directly, rather than by modulating FleQ expression.

297           Why, and under what conditions, might this regulatory circuit be active? Twitching motility is  
298 normally deployed on solid or semi-solid surfaces (8) while flagella are typically used in liquid and low  
299 viscosity conditions. One might predict that the systems are differentially activated in response to  
300 relevant environmental conditions. Instead, the regulatory integration of these two systems may be an  
301 adaptation to life as an opportunistic pathogen. T4P and flagella are typically expressed during the acute  
302 phase of infection (4, 45) and during the transition to the chronic infection phase, motility systems are  
303 downregulated in favour of those promoting Type VI secretion and biofilm formation (43, 46). Clinical  
304 isolates of *P. aeruginosa* from chronically colonized patients are often both non-flagellated and non-  
305 piliated (47). Lack of the immunogenic flagellum may help *P. aeruginosa* escape phagocytosis (47) and  
306 aflagellate bacteria are better able to evade the inflammatory response of the host (48). Placing *fleSR*  
307 under control of PilSR may facilitate a more rapid transition to the chronic disease state and more  
308 efficient evasion of the host immune system. Similarly, both T4P and flagella are required for surface  
309 sensing and surface-associated behaviours such as swarming motility and activation of virulence  
310 cascades (26, 42, 49, 50). Co-regulation of their expression may allow *P. aeruginosa* and other motile  
311 bacteria to amplify their responses to surface detection.

312           We identified 34 genes in addition to *pilA* whose expression was altered  $\geq 3$  fold by loss of *pilR*,  
313 24 of which were dysregulated in a pilin unresponsive manner, supporting previous work in *G.*  
314 *sulfurreducens* that identified putative PilR binding sites upstream of multiple genes (25). Importantly,  
315 while *pilA* and *pilR* mutants look similar with respect to their T4P-related phenotypes, their transcription  
316 profiles and other phenotypic outputs are different. For example, expression of genes encoding proteins  
317 involved in flagellum biosynthesis, including *fleSR*, are downregulated in the absence of *pilR* but  
318 unaffected by loss of *pilA*. This work reveals a previously unappreciated regulatory connection between  
319 two diverse motility systems, with implications in detection of surface attachment and the transition  
320 from acute to chronic disease states in a host.

321

## 322 **METHODS**

### 323 ***Bacterial strains and growth conditions***

324           Unless otherwise specified, *Pseudomonas aeruginosa* PAK strains were grown in Lennox Broth  
325 (LB) (Bioshop) or on LB 1.5% agar plates at 37°C. Where the antibiotic kanamycin was used, it was  
326 introduced at a final concentration of 150µg/mL. Mutants were generated by homologous

327 recombination, using standard mating techniques described in (51). The strains and plasmids used in this  
328 study are outlined in **Table 1**. Plasmids were prepared using standard cloning techniques and introduced  
329 into *P. aeruginosa* using electroporation.

### 330 ***RNA isolation, library preparation, cDNA sequencing and analysis***

331 To isolate RNA, cells from strains of interest were streaked in triplicate onto half of an LB 1.5%  
332 agar plate (100x15mm petri dishes) and grown overnight at 37°C. Cells were scraped from the plates  
333 and resuspended in 1.5mL RNAprotect Bacteria Reagent (Qiagen) to maintain integrity of isolated RNA.  
334 Cells were chemically lysed using 1mg/mL lysozyme in 10mM Tris-HCl and 1mM EDTA, pH 8.0 and RNA  
335 isolated using the RNeasy mini kit (Qiagen) according to manufacturers' instructions. An on-column  
336 DNase treatment was performed to minimize potential DNA contamination. Purified RNA was eluted  
337 into 50µL nuclease free water and quantified.

338 The following steps were performed by the Farncombe Metagenomics Facility (McMaster  
339 University, Hamilton, ON, Canada). For RNAseq analysis, ribosomal RNA was depleted from 9 RNA  
340 samples (3x WT PAK, 3x *pilA* and 3x *pilR*) using the Ribo-zero rRNA depletion kit (Illumina) and cDNA  
341 libraries prepared by the NEBnext Ultra Directional Library Kit. Libraries were sequenced using paired  
342 end 75bp reads on the Illumina MiSeq platform. Reads were aligned to the PAO1 reference genome with  
343 98% of reads mapped and normalization and differential gene expression were calculated using the  
344 Rockhopper software (52). q-values for each identified gene are reported in **Tables S1-3**. The complete  
345 RNAseq dataset has been deposited in NCBI GEO (Accession number: GSE112597).

### 346 ***Twitching motility assays***

347 Twitching motility assays were performed as described in (53). Briefly, strains of interest were stab  
348 inoculated to the bottom of an LB 1% agar plate with a P10 pipette tip and plates were incubated upside  
349 down at 37°C for 16-24h. Following incubation, agar was carefully removed and the plastic petri dish  
350 was stained with 1% crystal violet for 20min. Excess dye was washed away with water and twitching  
351 zone diameters were quantified using ImageJ (<http://imagej.nih.gov/ij/>, NIH, Bethesda, MD). A one-way  
352 ANOVA statistical test was used to determine significant differences in twitching compared to WT.

### 353 ***Swarming motility assays***

354 Swarming motility assays were performed as described in (54). Briefly, strains of interest were grown  
355 overnight in 5mL LB cultures at 37°C. On the day of the assay, 0.5% agar plates with M8 buffer,

356 supplemented with 2mM MgSO<sub>4</sub>, 0.2% glucose, 0.05% L-glutamic acid and trace metals, were prepared  
357 and allowed to solidify at room temperature for 1.5h. Then, 3.5µL of culture were spotted onto the  
358 centre of a single plate and plates were incubated upright in a humidity-controlled 30°C incubator for  
359 48h. Plates were imaged using a standard computer scanner. Figures shown are representative of 3  
360 independent experiments.

### 361 ***Swimming motility assays***

362 Swimming motility plate assays were performed similarly to (55), with some modifications. Overnight  
363 5mL cultures of strains of interest were grown at 37°C in LB with shaking. On the day of inoculation, LB  
364 0.25% agar plates were prepared and allowed to solidify at room temperature for 1.5h. Cell cultures  
365 were standardized to an OD<sub>600</sub>=1.0 and 2µL were spotted onto the centre of each plate. Plates were  
366 incubated upright for 16h at 37°C and swimming zone diameters were quantified using ImageJ  
367 (<http://imagej.nih.gov/ij/>, NIH, Bethesda, MD). Where applicable, swimming zone diameters were  
368 defined at the outer most part of the swimming zone that was still uniform in appearance. Images are  
369 representative of 4 independent experiments. To determine statistical significance, a one-way ANOVA  
370 analysis with Dunnett's post-test was performed, using WT as the control strain.

### 371 ***Biofilm assays***

372 Biofilm assays were performed similarly to the method described in (33), with some modifications.  
373 Briefly, *P. aeruginosa* strains of interest were grown in 5mL liquid cultures of 50% LB/50% PBS (50/50  
374 media) overnight at 37°C with shaking. The following day, strains were subcultured 1:25 into fresh 50/50  
375 media and grown to a standardized OD<sub>600</sub>=0.1. Standardized cultures were then diluted 1:500 and 150µL  
376 of each strain of interest was plated in triplicate in a clear, 96 well plate (Nunc). The plate was closed  
377 with a 96-peg lid, providing a surface on which biofilms can form, sealed with parafilm and incubated  
378 with shaking for 18h at 37°C. To quantify planktonic growth, peg lids were removed and the 96-well  
379 plate was scanned at a wavelength of 600nm. To quantify biofilms, peglids were washed in PBS and  
380 stained with crystal violet for 15min. Following five 10min washes in water, crystal violet was solubilized  
381 in 33% acetic acid in a fresh 96 well plate, which was scanned at 595nm. Biofilm data was graphed as %  
382 WT, showing means and standard error of three independent experiments.

### 383 ***Caenorhabditis elegans slow killing pathogenicity assays***

384 Slow killing (SK) assays were performed as described previously (34). *Caenorhabditis elegans*  
385 strain N2 populations were propagated and maintained on Nematode Growth Media (NGM) plates

386 inoculated with *E. coli* OP50. Eggs were harvested to obtain a synchronized population by washing  
387 worms and eggs from NGM plates with M9 buffer. Worms were degraded by adding buffered bleach,  
388 leaving only eggs intact. Eggs were washed with M9 buffer and resuspended in M9 buffer with rocking  
389 overnight to allow eggs to hatch into L1 larvae. Synchronized L1 worms were plated on NGM plates for  
390 45h to develop into L4 worms. During this process, slow killing plates supplemented with 100 $\mu$ M 5-  
391 Fluoro-2'-deoxyuridine (FUDR) were prepared and inoculated with 100 $\mu$ L of a 5mL LB overnight culture  
392 of bacterial strains of interest and incubated at 37°C for 16-18h. Harvested and washed L4 worms (~30-  
393 40) were dropped by Pasteur pipette onto each SK plate. Using a dissecting microscope, plates were  
394 scored daily for dead worms, which were picked and removed. Survival curves were prepared using  
395 Graphpad Prism 5.01 (La Jolla, CA) and statistically significant differences in pathogenicity between  
396 strains were identified using Gehan-Breslow-Wilcoxon analysis.

### 397 ***pilA-lux reporter assay***

398 Luminescent reporter assays were performed as described previously (22). Strains of interest  
399 were transformed by electroporation with the pMS402-*ppilA* plasmid, which contains the luciferase  
400 genes under control of the *pilA* promoter. Strains were grown overnight in 5mL LB cultures  
401 supplemented with 150  $\mu$ g/mL kanamycin. The following day, a 1mL aliquot of a 1:20 dilution of cultures  
402 was prepared and 100 $\mu$ L samples were plated in triplicate in a white walled, clear bottom 96-well plate  
403 (3632 Costar, Corning Inc). Luminescence and OD<sub>600</sub> were measured at 15min intervals over 5h using a  
404 Synergy 4 microtitre plate reader (BioTek) programmed to shake continuously and incubate the plate at  
405 37°C. Luminescence was normalized to OD<sub>600</sub> and relative luminescence was plotted against time. Mean  
406 and standard error of >4 biological replicates are shown.

407

### 408 **ACKNOWLEDGEMENTS**

409 The authors thank Stephanie Jones for assistance with the RNAseq data analysis and Michael Surette for  
410 the PA14 transposon mutant library. This work was funded by a Canadian Institutes of Health Research  
411 grant MOP 86639 to LLB. SLNK held an Ontario Graduate Scholarship.

412

413

414

## 415 REFERENCES

- 416 1. West AH, Stock AM. 2001. Histidine kinases and response regulator proteins in two-component  
417 signalling systems. Trends Biochem Sci 26:369-376.
- 418 2. Rodrigue A, Quentin Y, Lazdunski A, Mejean V, Foglino M. 2000. Two-component systems in  
419 *Pseudomonas aeruginosa*: why so many? Trends Microbiol 8:498-504.
- 420 3. Arora SK, Ritchings BW, Almira EC, Lory S, Ramphal R. 1997. A transcriptional activator FleQ  
421 regulates mucin adhesion and flagellar gene expression in *Pseudomonas aeruginosa* in a cascade  
422 manner. J Bacteriol 179.
- 423 4. Ritchings BW, Almira EC, Lory S, Ramphal R. 1995. Cloning and phenotypic characterization of  
424 *fleS* and *fleR*, new response regulators of *Pseudomonas aeruginosa* which regulate motility and  
425 adhesion to mucin. Infect Immun 63:4868-4876.
- 426 5. Jimenez-Fernandez A, Lopez-Sanchez A, Jimenez-Diaz L, Navarrete B, Calero P, Platero AI,  
427 Govantes F. 2016. Complex interplay between FleQ, cyclic diguanylate and multiple  $\sigma$  factors  
428 coordinately regulates flagellar motility and biofilm development in *Pseudomonas putida*. PLoS  
429 One 11:e0163142.
- 430 6. Dasgupta N, Wolfgang MC, Goodman AL, Arora SK, Jyot J, Lory S, Rampha R. 2003. A four-tiered  
431 transcriptional regulatory circuit controls flagellar biogenesis in *Pseudomonas aeruginosa*. Mol  
432 Microbiol 50:809-824.
- 433 7. Bradley DE. 1980. A function of *Pseudomonas aeruginosa* PAO pili: twitching motility. Can J  
434 Microbiol 26:146-154.
- 435 8. Burrows LL. 2012. *Pseudomonas aeruginosa* twitching motility: type IV pili in action Annu Rev  
436 Microbiol 66:493-520.
- 437 9. Bradley DE. 1974. The adsorption of *Pseudomonas aeruginosa* pilus-dependent bacteriophages  
438 to a host mutant with nonretractile pili. Virology 58:149-163.
- 439 10. Biais N, Ladoux B, Higashi D, So M, Sheetz M. 2008. Cooperative retraction of bundled type IV  
440 pili enables nanotewton force generation. PLoS Biol 6:907-913.
- 441 11. Merz AJ, So M, Sheetz MP. 2000. Pilus retraction powers bacterial twitching motility. Nature  
442 407:102-102.
- 443 12. Cowles KN, Gitai Z. 2010. Surface association and the MreB cytoskeleton regulate pilus  
444 production, localization and function in *Pseudomonas aeruginosa*. Mol Microbiol 76:1411-1426.
- 445 13. Paranchych W, Sastry PA, Frost LS, Carpenter M, Armstrong GD, Watts TH. 1970. Biochemical  
446 studies on pili isolated from *Pseudomonas aeruginosa* strain PAO. Can J Microbiol 25:1175-1181.

- 447 14. Hobbs M, Collie ES, Free PD, Livingston SP, Mattick JS. 1993. PilS and PilR, a two-component  
448 transcriptional regulatory system controlling expression of type 4 fimbriae in *Pseudomonas*  
449 *aeruginosa*. Mol Microbiol 7:669-682.
- 450 15. Kehl-Fie TE, Porsch EA, Miller SE, St Geme Iii JW. 2009. Expression of *Kingella kingae* Type IV Pili  
451 Is Regulated by Sigma54, PilS and PilR. J Bacteriol 191:4976-4986.
- 452 16. Juarez K, Kim BC, Nevin K, Olivera L, Reguera G, Lovely DR, Methe BA. 2009. PilR, a  
453 transcriptional regulator for pilin and other genes required for Fe(III) reduction in *Geobacter*  
454 *sulfurreducens*. J Mol Microbiol Biotechnol 16:146-158.
- 455 17. Parker D, Kennan RM, Myers GS, Paulsen IT, Songer JG, Rood JJ. 2006. Regulation of type IV  
456 fimbrial biogenesis in *Dichelobacter nodosus*. J Bacteriol 188:4801-4811.
- 457 18. Wu SS, Kaiser D. 1997. Regulation of Expression of the *pilA* gene in *Myxococcus xanthus*. J  
458 Bacteriol 179:7748-7758.
- 459 19. Boyd JM, Koga T, Lory S. 1994. Identification and Characterization of PilS, an essential regulator  
460 of pilin expression in *Pseudomonas aeruginosa*. Mol Gen Genet 243:565-574.
- 461 20. Boyd JM, Lory S. 1996. Dual Function of PilS During Transcriptional Activation of the  
462 *Pseudomonas aeruginosa* Pilin Subunit Gene. J Bacteriol 178:831-839.
- 463 21. Ethier J, Boyd JM. 2000. Topological analysis and role of the transmembrane domain in polar  
464 targeting of PilS, a *Pseudomonas aeruginosa* sensor kinase. Mol Microbiol 38:891-903.
- 465 22. Kilmury SLN, Burrows LL. 2016. Type IV pilins regulate their own expression via direct  
466 intramembrane interactions with the sensor kinase PilS. Proc Natl Acad Sci USA 113:6017-22.
- 467 23. Ishimoto KS, Lory S. 1991. Identification of *pilR*, Which Encodes a Transcriptional Activator of the  
468 *Pseudomonas aeruginosa* Pilin Gene. J Bacteriol 174:3514-3521.
- 469 24. Jin S, Ishimoto KS, Lory S. 1994. PilR, a transcriptional regulator of piliation in *Pseudomonas*  
470 *aeruginosa*, binds to a cis-acting sequence upstream of the pilin gene promoter. Mol Microbiol  
471 14:1049-1057.
- 472 25. Krushkal J, Juarez K, Barbe JF, Qu Y, Andrade A, Puljic M, Adkins RM, Lovley DR, Ueki T. 2010.  
473 Genome-wide survey for PilR recognition sites of the metal-prokaryote *Geobacter*  
474 *sulfurreducens*. Gene 469:31-44.
- 475 26. Ellison C, Kan J, Dillard R, Kysela D, Ducret A, Berne C, Hampton C, Ke Z, Wright E, Biais N, Dalia  
476 A, Brun Y. 2017. Obstruction of pilus retraction stimulates bacterial surface sensing. Science  
477 358:535-538.



- 478 27. O'Toole GA, Kolter R. 1998. Flagellar and twitching motility are necessary for *Pseudomonas*  
479 *aeruginosa* biofilm development. *Mol Microbiol* 30:295-304.
- 480 28. Wolfgang MC, Lee VT, Gilmore ME, Lory S. 2003. Coordinate Regulation of bacterial virulence  
481 genes by a novel adenylate cyclase-dependent signaling pathway. *Dev Cell* 4:253-263.
- 482 29. Labaer J, Qiu Q, Anumanthan A, Mar W, Zuo D, Murthy TV, Taycher H, Halleck A, Hainsworth E,  
483 Lory S, Brizuela L. 2004. The *Pseudomonas aeruginosa* PAO1 gene collection. *Genome Res*  
484 14:2190-2200.
- 485 30. Siewering K, Jain S, Friedrich C, Webber-Birungi MT, Semchonok DA, Binzen I, Wagner A, Huntley  
486 S, Kahnt J, Klingl A, Boekema EJ, Sogaard-Andersen L, Van der Does C. 2014. Peptidoglycan-  
487 binding protein TsaP functions in surface assembly of type IV pili. *Proc Natl Acad Sci USA*  
488 111:953-961.
- 489 31. Giltner CL, Habash M, Burrows LL. 2010. *Pseudomonas aeruginosa* Minor Pilins Are Incorporated  
490 into Type IV Pili. *J Mol Biol* 298:444-461.
- 491 32. Liberati NT, Urbach JM, Miyata S, Lee DG, Drenkard E, Wu G, Villanueva J, Wei T, Ausubel FM.  
492 2006. An ordered, nonredundant library of *Pseudomonas aeruginosa* strain PA14 transposon  
493 insertion mutants. *Proc Natl Acad Sci USA* 103:2833-2838.
- 494 33. Nguyen UT, Wenderska IB, Chong MA, Koteva K, Wright GD, Burrows LL. 2012. Small-molecule  
495 modulators of *Listeria monocytogenes* biofilm development. *Appl Environ Microbiol* 78:1454-  
496 1465.
- 497 34. Powell JR, Ausubel FM. 2008. Models of *Caenorhabditis elegans* infection by bacterial and fungal  
498 pathogens. *Methods in Mol Biol* 415:403-427.
- 499 35. Winsor GL, Griffiths EJ, Lo R, Dhillon BK, Shay JA, Brinkman FS. 2016. Enhanced annotations and  
500 features for comparing thousands of *Pseudomonas* genomes in the *Pseudomonas* genome  
501 database. *Nucleic Acids Res* 44:646-653.
- 502 36. Koga T, Ishimoto K, Lory S. 1993. Genetic and functional characterization of the gene cluster  
503 specifying expression of *Pseudomonas aeruginosa* pili. *Infect Immun* 61:1371-1377.
- 504 37. Overhage J, Lewenza S, Marr AK, Hancock RE. 2007. Identification of genes involved in swarming  
505 motility using a *Pseudomonas aeruginosa* PAO1 mini-Tn5-lux mutant library. *J Bacteriol*  
506 189:2164-2169.
- 507 38. Weller-Stuart T, Toth I, De Maayer P, Coutinho T. 2016. Swimming and twitching motility are  
508 essential for attachment and virulence of *Pantoea ananatis* in onion seedlings. *Mol Plant Path*  
509 18:734-745.

- 510 39. Han X, Kennan RM, Davies JK, Reddacliff LA, Dhungyel OP, Whittington RJ, Turnbull L,  
511 Whitchurch CB, Rood JI. 2008. Twitching motility is essential for virulence in *Dichelobacter*  
512 *nodosus*. J Bacteriol 190:3323-3335.
- 513 40. Zolfaghar I, Evans DJ, Fleiszig SM. 2003. Twitching motility contributes to the role of pili in  
514 corneal infection caused by *Pseudomonas aeruginosa*. Infect Immun 71:5389-5393.
- 515 41. Bertrand JJ, West JT, Engel JN. 2010. Genetic Analysis of the Regulation of Type IV Pilus Function  
516 by the Chp Chemosensory System of *Pseudomonas aeruginosa*. J Bacteriol 192:994-1010.
- 517 42. Kohler T, Curty LK, Barja F, vanDelden C, Pechere JC. 2000. Swarming of *Pseudomonas*  
518 *aeruginosa* is dependent on cell-to-cell signaling and requires flagella and pili. J Bacteriol  
519 182:5990-5996.
- 520 43. Francis VI, Stevenson EC, Porter SL. 2017. Two-component systems required for virulence in  
521 *Pseudomonas aeruginosa*. FEMS Microbiol Lett 364:fnx104.
- 522 44. Breidenstein EBM, Khaira BK, Wiegand I, Overhage J, Hancock REW. 2008. Complex ciprofloxacin  
523 resistome revealed by screening a *Pseudomonas aeruginosa* mutant library for altered  
524 susceptibility. Antimicrob Agents Chemother 52:4486-4491.
- 525 45. Hahn HP. 1997. The type-4 pilus is the major virulence-associated adhesin of *Pseudomonas*  
526 *aeruginosa*—a review. Gene 192:99-108.
- 527 46. Singh PK, Schaefer AL, Parsek MR, Moninger TO, Welsh MJ, Greenberg EP. 2000. Quorum-  
528 sensing signals indicate that cystic fibrosis lungs are infected with bacterial biofilms. Nature  
529 407:762-764.
- 530 47. Mahenthiralingam E, Campbell ME, Speert DP. 1994. Nonmotility and phagocytic resistance of  
531 *Pseudomonas aeruginosa* isolates from chronically colonized patients with cystic fibrosis. Infect  
532 Immun 62:596-605.
- 533 48. Hayashi N, Nishizawa H, Kitao S, Deguchi S, Nakamura T, Fujimoto A, Shikata M, Gotoh N. 2015.  
534 *Pseudomonas aeruginosa* injects type III effector ExoS into epithelial cells through the function  
535 of type IV pili. FEBS Lett 589:890-896.
- 536 49. Luo Y, Zhao K, Kuchma SL, Coggan KA, Wolfgang MC, Wong GC, O'Toole GA. 2015. A hierarchical  
537 cascade of second messengers regulates *Pseudomonas aeruginosa* surface behaviors. mBio 26.
- 538 50. Siryaporn A, Kuchma SL, O'Toole GA, Gitai Z. 2014. Surface attachment induces *Pseudomonas*  
539 *aeruginosa* virulence. Proc Natl Acad Sci USA 111:16860-16865.

- 540 51. Hoang TT, Karkhoff-Schweizer RR, Kutchma AJ, Schweizer HP. 1998. A broad-host-range Flp-FRT  
541 recombination system for site-specific excision of chromosomally-located DNA sequences:  
542 application for isolation of unmarked *Pseudomonas aeruginosa* mutants. *Gene* 212:77-86.
- 543 52. McClure M, Balasubramanian D, Sun Y, Bobrovskyy M, Sumbly P, Genco CA, Vanderpool CK,  
544 Tjaden B. 2013. Computational analysis of bacterial RNA-seq data. *Nucleic Acids Res* 41.
- 545 53. Kus JV, Cvitkovitch DG, Burrows LL. 2004. Significant differences in type IV pilin allele distribution  
546 among *Pseudomonas aeruginosa* isolates from cystic fibrosis (CF) versus non-CF patients.  
547 *Microbiol* 150:1315-1326.
- 548 54. Buensuceso RNC, Daniel-Ivad M, Kilmury SLN, Leighton TL, Harvey H, Howell PL, Burrows LL.  
549 2017. cAMP-independent control of twitching motility in *Pseudomonas aeruginosa*. *J Bacteriol*  
550 doi:10.1128/JB.00188-17.
- 551 55. Kuchma SL, Brothers KM, Merritt JH, Liberati NT, Ausubel FM, O'Toole GA. 2007. BifA, a cyclic-di-  
552 GMP phosphodiesterase inversely regulates biofilm formation and swarming motility by  
553 *Pseudomonas aeruginosa* PA14. *J Bacteriol* 189:8165-8178.

554

555

## 556 **FIGURE CAPTIONS**

557 **Figure 1. RNAseq experimental design.** Our RNAseq experiment was designed to distinguish between  
558 genes dysregulated by loss of *pilR* versus loss of *pilA*, as *pilR* mutants also lack the pilin protein. Genes  
559 coordinately dysregulated in both *pilA* and *pilR* compared to WT may be due to loss of PilA or pilus  
560 expression. Genes that are inversely dysregulated in *pilA* and *pilR* mutants are upregulated in the  
561 absence of PilA (pilin responsive), in a *pilR*-dependent manner. Genes dysregulated by loss of *pilR* but  
562 not *pilA* are dependent only on PilR expression and referred to as pilin unresponsive in this study.

563 **Figure 2: Multiple T4P and non-T4P genes are dysregulated by loss of *pilR*.** The heat maps highlight  
564 select genes of interest that are  $\geq 3$ -fold dysregulated by the loss of *pilR*, or both *pilA* and *pilR*. In addition  
565 to *pilA*, several other T4P associated genes have altered expression in *pilA* and/or *pilR* mutants.  
566 Expression of ten genes, mostly hypothetical or unannotated, is increased in a *pilA* mutant but  
567 decreased in *pilR*, which also lacks PilA. Of the genes dysregulated in a *pilR* mutant, many were  
568 associated with flagellar biosynthesis and function, including those encoding the FleS-FleR TCS.

569 **Figure 3: PA14 mutant homologs of inversely dysregulated genes affect motility phenotypes.** Available  
570 PA14 transposon mutant homologs of inversely dysregulated genes identified in PAK were tested for **A)**  
571 twitching, **B)** swarming and **C)** swimming motilities, **D)** biofilm formation, and **E)** pathogenicity towards  
572 *Caenorhabditis elegans* to identify the functions of hypothetical proteins. All mutants displayed WT  
573 twitching, but only a subset had defects in swimming and/or swarming motility. Several mutants  
574 exhibited a hyperbiofilm phenotype, while two had defects in *C. elegans* killing (\*\*\*)  $p < 0.005$ ).

575 **Figure 4: Swimming motility is impaired in *piIS* and *piIR* mutants.** Loss of *piIS* or *piIR* results in  
576 decreased swimming motility (~40% of WT) in a plate-based assay. *piIA* mutants swim comparably to  
577 WT, indicating that the swimming defect is not PilA dependent. *piIS* and *piIR* mutants appear to acquire  
578 suppressors that overcome these defects resulting in asymmetrical flares. Reinoculation of swimming  
579 plates with cells from the interior of swimming zones—inside the dotted white circles of *piISR* (inner)  
580 recapitulate the original phenotype, while cells taken from the flares (outer, from flares outside the  
581 white circle, except for WT) swim to WT levels. Asterisks denote the location from which cells were  
582 taken for the reinoculated swimming plates.

583 **Figure 5: Loss of *fleSR* reduces twitching motility but increases *piIA* transcription.** **A)** Loss of *fleSR*  
584 reduces twitching motility by approximately 20%. Mean and standard error of 6 independent replicates  
585 are shown. Significance determined by one-way ANOVA. **B)** A *lux-piIA* luminescent reporter assay  
586 measuring *piIA* promoter activity indicated that *piIA* transcription is increased over 5h. Mean and  
587 standard error of 4 biological replicates are shown.

588 **Figure 6: Model for *piISR* dependent regulation of *fleSR* and the *fleSR* regulon.** Under conditions in  
589 which *piISR* expression is decreased (low cAMP) or perhaps when their activity is low (high intracellular  
590 PilA), *fleSR* transcription is decreased. As a result, in *piISR* mutants, as is expression of the the *fleSR*  
591 regulon. Genes in red are those that had decreased expression in a *piIR* mutant in RNAseq. Grey genes  
592 did not have sufficient reads assigned to them from RNAseq to accurately report differential expression.  
593 FleQ (blue) was not differentially expressed between WT or *piIR* indicating that *piISR* fits into the  
594 flagellar regulatory hierarchy after FleQ but before *fleSR*, as *fleQ* itself, and most FleQ dependent genes  
595 were unaffected by loss of *piIR*.

596

597 **Figure S1: RT-PCR validation of *fleSR* transcription levels.** *fleS-fleR* were downregulated approximately  
598 2-fold in *pilS* and *pilR*, but not *pilA*. Mean and standard error of 3 independent experiments are shown.

599 **Figure S2: Putative suppressors that restore swimming do not affect swarming motility in *pilSR***  
600 ***mutants*.** Cells from *pilS* and *pilR* mutants with putative suppressor mutations that restore swimming  
601 motility (outer) were inoculated in a swarming assay for comparison to *pilS* and *pilR* mutants that do not  
602 have suppressors (inner). Strains with possible suppressors still exhibit *pilS* and *pilR*-like swarming  
603 motility patterns indicating that the *pilSR* phenotype is dominant.

604

605

## 606 TABLE LEGENDS

607 **Table 1. PA and corresponding PA14 gene numbers of inversely dysregulated (pilin responsive) genes**

608 **Table 2. Strains and plasmids used in this study**

609 **Table S1. Genes similarly dysregulated in *pilA* and *pilR***

610 **Table S2. Genes inversely dysregulated in *pilA* and *pilR***

611 **Table S3. Genes dysregulated by loss of *pilR* only**

**Table 1:** PA and corresponding PA14 gene numbers of inversely dysregulated (pilin responsive) genes

| <b>PA Number (PAO1)</b> | <b>PA14 Number</b> | <b>Gene name</b> | <b>Product</b>                                                                   |
|-------------------------|--------------------|------------------|----------------------------------------------------------------------------------|
| PA0952                  | PA14_51940         |                  | Hypothetical protein                                                             |
| PA1512                  | PA14_44890         | <i>hcpA</i>      | Secreted protein (Type VI secretion)                                             |
| PA4027                  | PA14_11740         |                  | Hypothetical protein:<br>Putative bacterial extracellular solute binding protein |
| PA4683                  | PA14_61950         |                  | Hypothetical protein                                                             |
| PA5228                  | PA14_69040         |                  | Hypothetical protein:<br>Putative 5-formyltetrahydrofolate cyclo-ligase          |
| PA5267                  | PA14_69560         | <i>hcpB</i>      | Secreted protein (Type VI secretion)                                             |

**Table 2: Strains and plasmids used in this study**

| <b>Strain</b>        | <b>Description</b>                                                                                                 | <b>Source</b> |
|----------------------|--------------------------------------------------------------------------------------------------------------------|---------------|
| PAK WT               | WT Group II strain of <i>P. aeruginosa</i>                                                                         | (J. Boyd)     |
| <i>pilA</i>          | PAK with chromosomal deletion of <i>pilA</i>                                                                       | (This study)  |
| <i>pilS</i>          | PAK with chromosomal deletion of <i>pilS</i>                                                                       | (This study)  |
| <i>pilR</i>          | PAK with chromosomal deletion of <i>pilR</i>                                                                       | (This study)  |
| <i>fliC</i>          | PAK with FRT insertion in <i>fliC</i>                                                                              | (This study)  |
| <i>fleSR</i>         | PAK with chromosomal of the full <i>fleS-fleR operon</i>                                                           | (This study)  |
| PA14 WT              | WT Group III strain of <i>P. aeruginosa</i>                                                                        | (32)          |
| PA14_51950           | PA14 with a transposon insertion in gene PA14_51950                                                                | (32)          |
| PA14_44890           | PA14 with a transposon insertion in PA14_44890 ( <i>hcpA</i> )                                                     | (32)          |
| PA14_11740           | PA14 with a transposon insertion in PA14_11740                                                                     | (32)          |
| PA14_61950           | PA14 with a transposon insertion in PA14_61950                                                                     | (32)          |
| PA14_69040           | PA14 with a transposon insertion in PA14_69040                                                                     | (32)          |
| PA14_69560           | PA14 with a transposon insertion in PA14_69560 ( <i>hcpB</i> )                                                     | (32)          |
| <b>Plasmid</b>       |                                                                                                                    |               |
| pMS402- <i>ppilA</i> | <i>pilA</i> promoter cloned into the BamHI site of pMS402, putting lux genes under control of <i>pilA</i> promoter | (22)          |

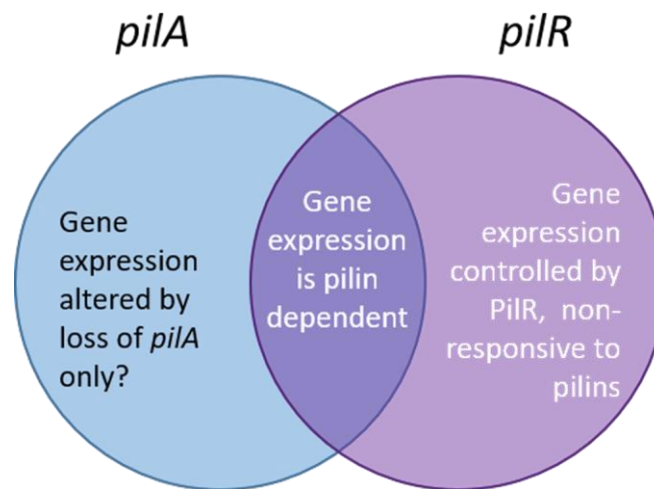

**Figure 1. RNAseq experimental design.** Our RNAseq experiment was designed to distinguish between genes dysregulated by loss of *pilR* versus loss of *pilA*, as *pilR* mutants also lack the pilin protein. Genes coordinately dysregulated in both *pilA* and *pilR* compared to WT may be due to loss of PilA or pilus expression. Genes that are inversely dysregulated in *pilA* and *pilR* mutants are upregulated in the absence of PilA (pilin responsive), in a *pilR*-dependent manner. Genes dysregulated by loss of *pilR* but not *pilA* are dependent only on PilR expression and referred to as pilin unresponsive in this study.





and/or *pilR* mutants. Expression of ten genes, mostly hypothetical or unannotated, is increased in a *pilA* mutant but decreased in *pilR*, which also lacks PilA. Of the genes dysregulated in a *pilR* mutant, many were associated with flagellar biosynthesis and function, including those encoding the FleS-FleR TCS.

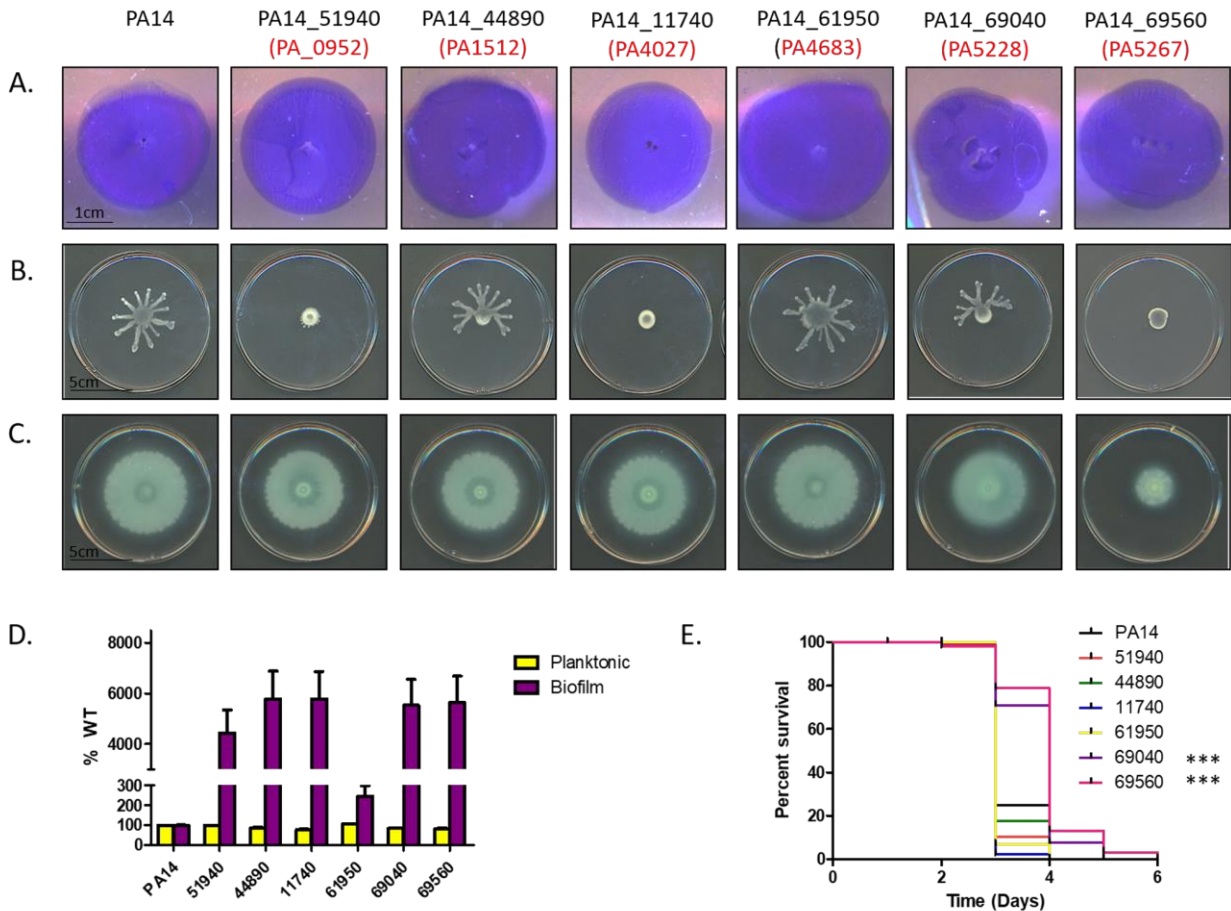

**Figure 3: PA14 mutant homologs of inversely dysregulated genes affect motility phenotypes.** Available PA14 transposon mutant homologs of inversely dysregulated genes identified in PAK were tested for **A)** twitching, **B)** swarming and **C)** swimming motilities, **D)** biofilm formation, and **E)** pathogenicity towards *Caenorhabditis elegans* to identify the functions of hypothetical proteins. All mutants displayed WT twitching, but some had varying defects in swimming and/or swarming motility. Several mutants also exhibited a hyperbiofilm phenotype, while two had defects in *C. elegans* killing (\*\*\*)  $p < 0.005$ ).

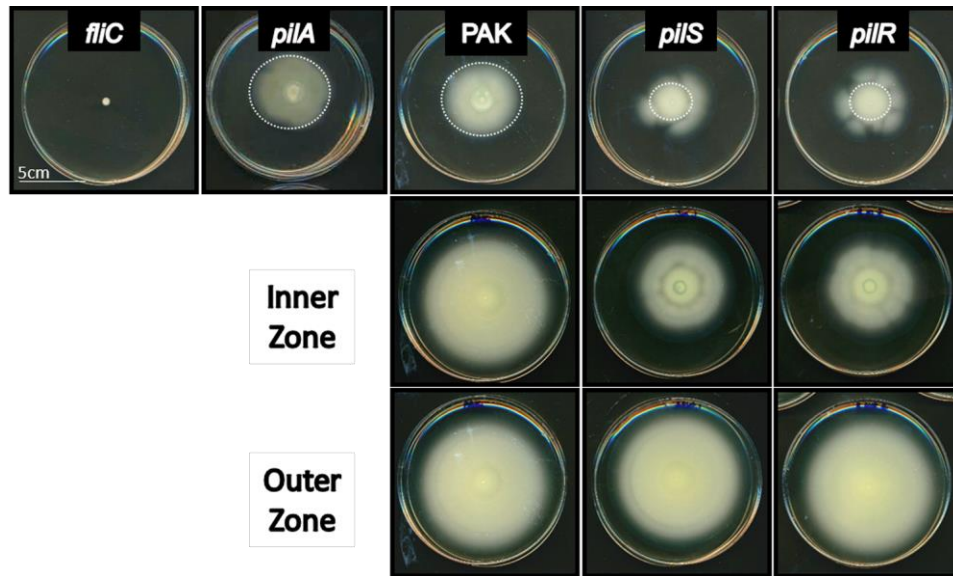

**Figure 4: Swimming motility is impaired in *pilS* and *pilR* mutants.** Loss of *pilS* or *pilR* results in decreased swimming motility (~40% of WT) in a plate-based assay. *pilA* mutants swim comparably to WT, indicating that the swimming defect is not PilA dependent. *pilS* and *pilR* mutants appear to acquire suppressors that overcome these defects resulting in asymmetrical flares. Reinoculation of swimming plates with cells from the interior of swimming zones—inside the dotted white circles of *pilSR* (inner) recapitulate the original phenotype, while cells taken from the flares (outer, from flares outside the white circle, except for WT) swim to WT levels. Asterisks denote the location from which cells were taken for the reinoculated swimming plates.

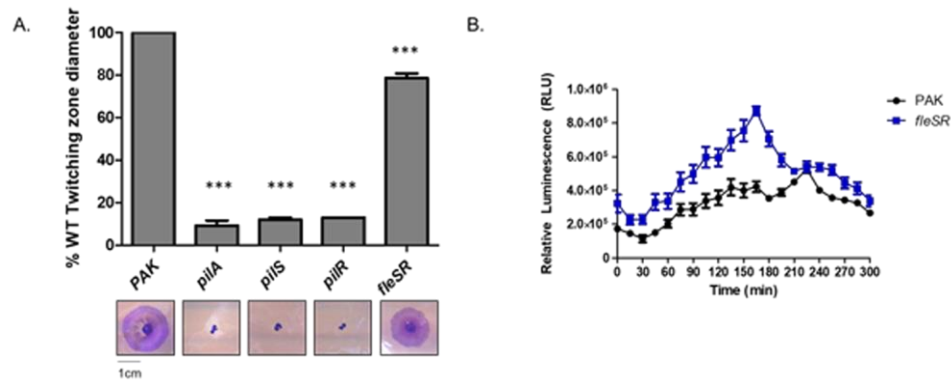

**Figure 5: Loss of *fleSR* reduces twitching motility but increases *pilA* transcription. A)**

Loss of *fleSR* reduces twitching motility by approximately 20%. Mean and standard error of 6 independent replicates are shown. Significance determined by one-way ANOVA. **B)** A *lux-pilA* luminescent reporter assay measuring *pilA* promoter activity indicated that *pilA* transcription is increased over 5h. Mean and standard error of 4 biological replicates are shown.

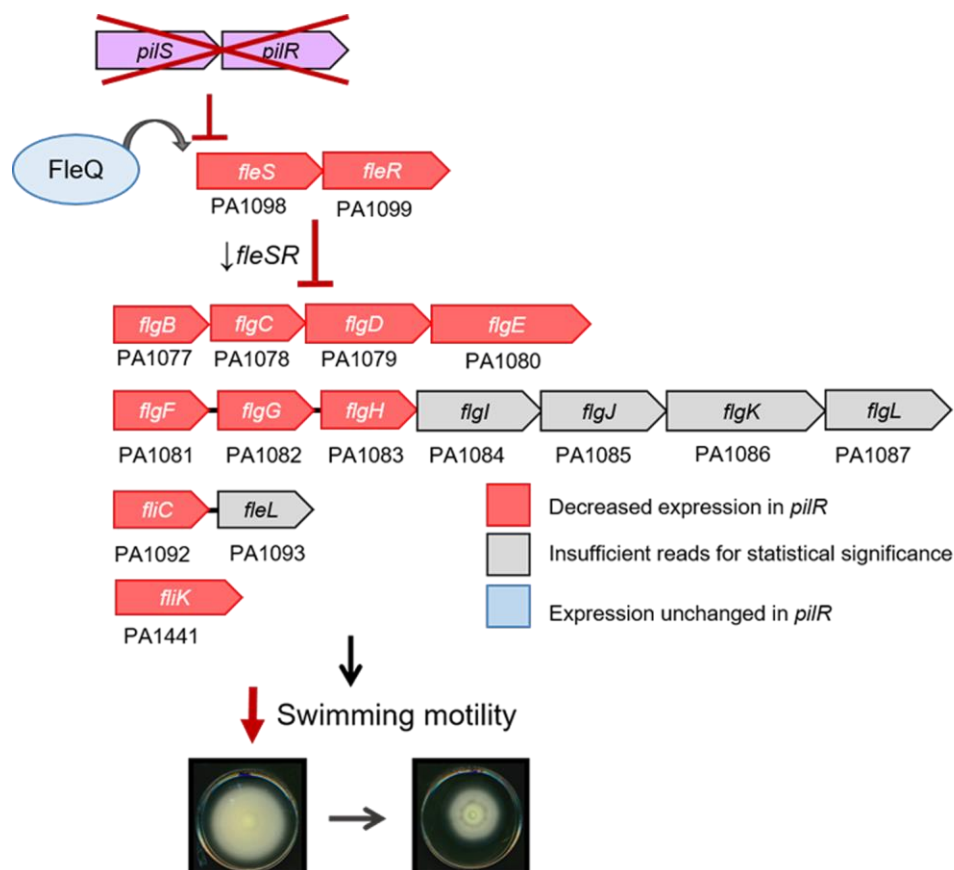

**Figure 6: Model for *pilSR* dependent regulation of *fleSR* and the *fleSR* regulon.** Under conditions in which *pilSR* expression is decreased (low cAMP) or perhaps when their activity is low (high intracellular PilA), *fleSR* transcription is decreased. As a result, in *pilSR* mutants, as is expression of the the *fleSR* regulon. Genes in red are those that had decreased expression in a *pilR* mutant in RNAseq. Grey genes did not have sufficient reads assigned to them from RNAseq to accurately report differential expression. FleQ (blue) was not differentially expressed between WT or *pilR* indicating that *pilSR* fits into the flagellar regulatory hierarchy after FleQ but before *fleSR*, as *fleQ* itself, and most FleQ dependent genes were unaffected by loss of *pilR*.
